# Supplementary material for: Genome Characterization, Prevalence and Distribution of a Macula-Like Virus from Apis mellifera and Varroa destructor
Source: PubMed Central journal article supplement (PMC4517118; doi:10.3390/v7072789), 2015-07-06
Supplement: viruses-07-02789-s001.pdf [file viruses-07-02789-s001.pdf]

## Supplementary Information

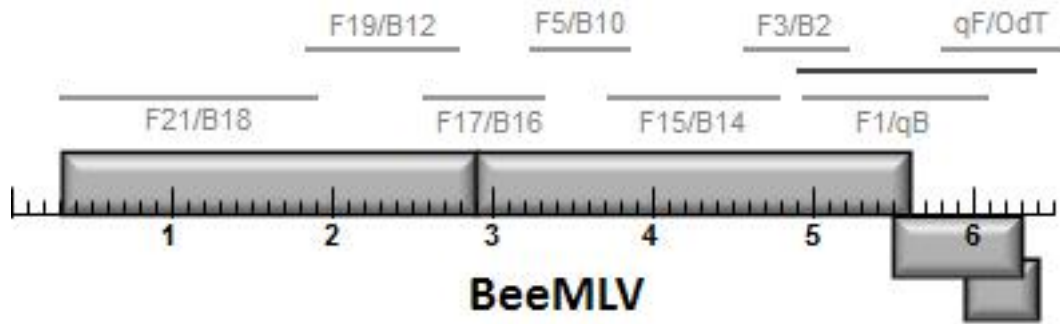

**Figure S1.** Sequencing map. Map of PCR fragments (light grey) used for confirmatory “Sanger” sequencing of the European BeeMLV genome, and the location of the original USA partial clone (dark grey).

**Table S1.** Primers. Name, sequence and genome location of primers for amplifying RT-PCR fragments for sequence analyses (unshaded) and quantitative RT-qPCR analyses (shaded grey). Also shown are the fragment sizes, amplification efficiency ( $E$ ), log-linearity between  $Cq$  value and template amount over 8 orders of magnitude ( $r^2$ ) and melting temperatures ( $T_m$ ) of the PCR products [14].

| Assay     | Primers    | Sequence (5'-3')        | Size | Location 3' | $E$         | $r^2$       | $T_m$       |
|-----------|------------|-------------------------|------|-------------|-------------|-------------|-------------|
| Phylogeny | BeeMLV-F   | ATCCCTTTTCAGTTCGCT      | 438  | 5807        | <i>n.a.</i> | <i>n.a.</i> | <i>n.a.</i> |
|           | BeeMLV-R   | AGAAGAGACTTCAAGGAC      |      | 6210        |             |             |             |
| Sequence  | BeeMLV-qF  | GCTCGTATTCTGCTACTCC     | 707  | 5745        | <i>n.a.</i> | <i>n.a.</i> | <i>n.a.</i> |
|           | Oligo-dT   | TTTTTTTTTTTTTTTTTTTTTTT |      | 6408        |             |             |             |
|           | BeeMLV-F1  | CTTCGTGACGGAGACGACTC    | 853  | 5046        | <i>n.a.</i> | <i>n.a.</i> | <i>n.a.</i> |
|           | BeeMLV-qB  | TTGACGGATTGAGGGATGC     |      | 5860        |             |             |             |
|           | BeeMLV-F3  | ACCGTCCGACCCGGACTG      | 636  | 4515        | <i>n.a.</i> | <i>n.a.</i> | <i>n.a.</i> |
|           | BeeMLV-B2  | GATCGATCTGTATTTGAAGCG   |      | 5111        |             |             |             |
|           | BeeMLV-F15 | TACCACGCCGTCACATGGG     | 1088 | 3557        | <i>n.a.</i> | <i>n.a.</i> | <i>n.a.</i> |
|           | BeeMLV-B14 | CACGTAATCATGCATGAG      |      | 4609        |             |             |             |
|           | BeeMLV-F5  | ACCAATTTACGACCTGAGTG    | 581  | 3099        | <i>n.a.</i> | <i>n.a.</i> | <i>n.a.</i> |
|           | BeeMLV-B10 | CGAACGAGTCAGCGCCAC      |      | 3643        |             |             |             |
|           | BeeMLV-F17 | TGCCCGACTGCCAGCTTG      | 664  | 2522        | <i>n.a.</i> | <i>n.a.</i> | <i>n.a.</i> |
|           | BeeMLV-B16 | TTGGTGAGCGCGGTTTCCCA    |      | 3149        |             |             |             |
|           | BeeMLV-F19 | TCTCTCCGCCGTTTCGG       | 1047 | 1548        | <i>n.a.</i> | <i>n.a.</i> | <i>n.a.</i> |
|           | BeeMLV-B12 | AGCCAGTGC GGAAAGATG     |      | 2560        |             |             |             |
|           | BeeMLV-F21 | GCTCAGCGCCAGCATCCACC    | 1490 | 0080        | <i>n.a.</i> | <i>n.a.</i> | <i>n.a.</i> |
|           | BeeMLV-B18 | GGGCCGAAACGGCGGAA       |      | 1534        |             |             |             |

Table S1. *Cont.*

| Assay              | Primers     | Sequence (5'-3')        | Size | Location 3' | <i>E</i> | <i>r</i> <sup>2</sup> | <i>T<sub>m</sub></i> |
|--------------------|-------------|-------------------------|------|-------------|----------|-----------------------|----------------------|
| RT-qPCR            | BeeMLV-852F | CAAAGGCATCGACTACGTCTTCT | 98   | sub-genomic | 1.945    | 0.999                 | 84.0 °C              |
|                    | BeeMLV-949R | CGAGCACGGCCTCAAGAG      |      |             |          |                       |                      |
|                    | BeeMLV-F    | ATCCCTTTTCAGTTCGCT      | 142  | sub-genomic | 1.988    | 0.999                 | 84.8 °C              |
|                    | BeeMLV-949R | CGAGCACGGCCTCAAGAG      |      |             |          |                       |                      |
|                    | BeeMLV-F1   | CTTCGTCAGCGGAGACGACTC   | 163  | genomic     | 1.965    | 0.999                 | 82.5 °C              |
|                    | BeeMLV-B2   | GATCTGTATTTTGAAGCG      |      |             |          |                       |                      |
|                    | BeeMLV-F3   | ACCGTCCGACCCCGACTG      | 130  | genomic     | 1.948    | 0.999                 | 84.1 °C              |
|                    | BeeMLV-B14  | CACGTAATCATGCATGAG      |      |             |          |                       |                      |
| Internal Reference | Q-TMV-fwd   | CATGCGAACATCAGCCAATG    | 55   | reference   | 1.995    | 0.999                 | 81.5 °C              |
|                    | Q-TMV-rev   | TGTAGCGCAATGGCGTACAC    |      |             |          |                       |                      |

**Table S2.** Viruses and accession numbers. Names, accession numbers and genomic characteristics of BeeMLV and the Tymo-Marafi- and Maculaviruses used in the phylogenetic analyses. Bold type, intensity of letter font and grey shades represent similarity with the BeeMLV genome. The genomic characteristics tabulated are (left-to-right): presence of a natural poly-A tail (Poly-A); presence of a Movement Protein (MP); presence of a Proline-rich region (PRR); presence of an endopeptidase site (P-Pro); presence of a sub-genomic RNA promoter (sg-promoter); presence of a separate ORF encoding the capsid protein (CP); presence of small overlapping ORF's at the 3' end (3' ORFs); presence of an intergenic region separating the main and CP ORFs (IGR).

| <b>TYMOVIRIDAE</b>            | <b>ACRONYM</b> | <b>ACCESSION</b> | <b>GENUS</b> | <b>Poly-A</b> | <b>MP</b> | <b>PRR</b> | <b>P-Pro</b> | <b>Sg-promoter</b> | <b>CP ORF</b> | <b>3' ORFs</b> | <b>IGR</b> |
|-------------------------------|----------------|------------------|--------------|---------------|-----------|------------|--------------|--------------------|---------------|----------------|------------|
| Anagryis vein yellowing virus | AnVYV          | AY751780         |              | no            | yes       | <b>yes</b> | <b>yes</b>   | <b>yes</b>         | <b>yes</b>    | no             | <b>no</b>  |
| Chayote mosaic virus          | ChMV           | AF195000         |              | no            | yes       | <b>yes</b> | <b>yes</b>   | <b>yes</b>         | <b>yes</b>    | no             | yes        |
| Chiltepin yellow mosaic virus | ChYMV          | FN563123         |              | no            | yes       | <b>yes</b> | <b>yes</b>   | <b>yes</b>         | <b>yes</b>    | no             | yes        |
| Diascia yellow mottle virus   | DiYMV          | EU684141         |              | no            | yes       | <b>yes</b> | <b>yes</b>   | <b>yes</b>         | <b>yes</b>    | no             | yes        |
| Dulcamara mottle virus        | DuMV           | AY789137         |              | no            | yes       | <b>yes</b> | <b>yes</b>   | <b>yes</b>         | <b>yes</b>    | no             | yes        |
| Eggplant mosaic virus         | EMV            | J04374           |              | no            | yes       | <b>yes</b> | <b>yes</b>   | <b>yes</b>         | <b>yes</b>    | no             | yes        |
| Erysium latent virus          | ErLV           | AF098523         |              | no            | yes       | <b>yes</b> | <b>yes</b>   | <b>yes</b>         | <b>yes</b>    | no             | <b>no</b>  |
| Kennedya yellow mosaic virus  | KeYMV          | D00637           |              | no            | yes       | <b>yes</b> | <b>yes</b>   | <b>yes</b>         | <b>yes</b>    | no             | yes        |
| Mertensia leaf curl virus     | MeLCV          | FJ713524         | Tymovirus    | no            | ?         | <b>yes</b> | <b>yes</b>   | <b>yes</b>         | <b>yes</b>    | no             | yes        |
| Nemesia ring necrosis virus   | NeRNV          | AY751778         |              | no            | yes       | <b>yes</b> | <b>yes</b>   | <b>yes</b>         | <b>yes</b>    | no             | yes        |
| Okra mosaic virus             | OMV            | EF554577         |              | no            | yes       | <b>yes</b> | <b>yes</b>   | <b>yes</b>         | <b>yes</b>    | no             | yes        |
| Onosis yellow mosaic virus    | OnYMV          | J04375           |              | no            | yes       | <b>yes</b> | <b>yes</b>   | <b>yes</b>         | <b>yes</b>    | no             | <b>no</b>  |
| Physalis mottle virus         | PhMV           | Y16104           |              | no            | yes       | <b>yes</b> | <b>yes</b>   | <b>yes</b>         | <b>yes</b>    | no             | yes        |
| Plantago mottle virus         | PIMV           | AY751779         |              | no            | yes       | <b>yes</b> | <b>yes</b>   | <b>yes</b>         | <b>yes</b>    | no             | yes        |
| Poinsettia mosaic virus       | PoMV           | AB550789         |              | no            | yes       | <b>yes</b> | <b>yes</b>   | <b>yes</b>         | <b>yes</b>    | no             | <b>no</b>  |
| Scrophularia mottle virus     | ScMV           | AY751777         |              | no            | yes       | <b>yes</b> | <b>yes</b>   | <b>yes</b>         | <b>yes</b>    | no             | <b>no</b>  |
| Turnip yellow mosaic virus    | TYMV           | AF035403         |              | no            | yes       | <b>yes</b> | <b>yes</b>   | <b>yes</b>         | <b>yes</b>    | no             | yes        |

Table S2. Cont.

| TYMOVIRIDAE                             | ACRONYM | ACCESSION  | GENUS       | Poly-A | MP  | PRR | P-Pro | Sg-promoter | CP ORF  | 3' ORFs | IGR |
|-----------------------------------------|---------|------------|-------------|--------|-----|-----|-------|-------------|---------|---------|-----|
| Grapevine Syrah virus-1                 | GSyV-1  | FJ436028   | Marafivirus | yes    | yes | yes | yes   | yes         | no (2)  | no      | no  |
| Blackberry virus-S                      | BVS     | FJ915122   |             | yes    | no  | yes | yes   | yes         | no (2)  | no      | no  |
| Citrus sudden death associated virus    | CSDaV   | AY884005   |             | yes    | no  | yes | yes   | yes         | no (2)  | yes     | no  |
| Maize rayado fino virus                 | MRFV    | AF265566   |             | no     | yes | yes | yes   | yes         | no (2)  | no      | no  |
| Oat blue dwarf virus                    | OBDV    | U87832     |             | yes    | no  | yes | yes   | yes         | yes (1) | no      | no  |
| Olive latent virus 3                    | OLV3    | FJ444852   |             | yes    | yes | yes | yes   | yes         | yes (1) | yes     | yes |
| Grapevine fleck virus                   | GFkV    | AJ309022   |             | yes    | no  | yes | yes   | no          | yes     | yes     | yes |
| Grapevine red globe virus               | GRGV    | AF521977   | yes         | no     | yes | yes | no    | yes         | yes     | no      |     |
| Fig fleck-associated virus              | FFkaV   | FM200426   | Maculavirus | yes    | yes | yes | yes   | no          | no      | no      | no  |
| Bombyx mori Macula-like latent virus    | BmMLV   | AB186123   |             | yes    | no  | yes | yes   | no          | yes     | yes     | yes |
| Culex-originated Tymoviridae-like virus | CuTLV   | JQ429443   |             | yes    | no  | yes | yes   | no          | yes     | yes     | yes |
| Bee Macula-like virus                   | BeeMLV  | KT162924/5 | ?           | yes    | no  | yes | yes   | yes         | yes     | yes     | no  |

**Table S3.** Reference collection analysis. Comparison of the physico-chemical characteristics of BeeMLV with previously characterized and as-yet unsequenced historical viruses. Bold type, intensity of letter font and grey shading represent level of similarity.

| VIRUS                           | SHAPE       | SIZE         | CAPSID PROTEINS | GENOME         |
|---------------------------------|-------------|--------------|-----------------|----------------|
| Cloudy wing virus               | icosahedral | 17 nm        | 19 kDa          | ~1.4 kb        |
| Bee virus-X                     | icosahedral | 35 nm        | 52 kDa          | ?              |
| Bee virus-Y                     | icosahedral | 35 nm        | 50 kDa          | ?              |
| Arkansas bee virus              | icosahedral | <b>30 nm</b> | 43 kDa          | ~5.6 kb        |
| Berkeley bee picorna-like virus | icosahedral | <b>30 nm</b> | 37-35-32 kDa    | ~9 kb          |
| Bee Macula-like virus           | icosahedral | <b>30 nm</b> | <b>24 kDa</b>   | <b>~6.5 kb</b> |

**Table S4.** Variability of BeeMLV and VTLV. Variability within and between the European and USA strains of BeeMLV, and between BeeMLV and VTLV, as represented by the average amino acid identities for the two main ORFs (RdRp; CP) and nucleotide identities across the genomes, as determined from comparisons between the different NGS assemblies for these viruses.

| <b>% Identity</b>                              | <b>Nucleotide</b> | <b>RdRp</b> | <b>CP</b> |
|------------------------------------------------|-------------------|-------------|-----------|
| within BeeMLV <sup>EU</sup>                    | 0.968             | 0.976       | 0.994     |
| within BeeMLV <sup>USA</sup>                   | 0.944             | 0.913       | 0.960     |
| within VTLV                                    | 0.923             | 0.957       | 0.962     |
| BeeMLV <sup>EU</sup> vs. BeeMLV <sup>USA</sup> | 0.708             | 0.723       | 0.809     |
| BeeMLV vs. VTLV                                | 0.519             | 0.488       | 0.404     |

© 2015 by the authors; licensee MDPI, Basel, Switzerland. This article is an open access article distributed under the terms and conditions of the Creative Commons Attribution license (<http://creativecommons.org/licenses/by/4.0/>).
